# Supplementary material for: Insight into the mechanism of action of plakortins, simple 1,2-dioxaneantimalarials
Source: Royal Society of Chemistry journal article supplement (doi:10.1039/b918600j), 2009-12-16

## ELECTRONIC SUPPLEMENTARY INFORMATION

### Insights Into the Mechanism of Action of Plakortins, Simple 1,2-Dioxane Antimalarials

Orazio Taglialatela-Scafati, Ernesto Fattorusso, Adriana Romano, Fernando Scala,  
Vincenzo Barone, Paola Cimino, Emiliano Stendardo, Bruno Catalanotti,  
Marco Persico, Caterina Fattorusso

Pag. 2      HPLC traces for separation of **5a/5b** and **6a/6b**  
Pag. 3      <sup>1</sup>H NMR spectra of compounds **5a** and **6a**

HPLC trace for purification of compounds **5a** (peak 2,  $t_R$  4 min) and **5b** (peak 1,  $t_R$  2 min)  
Stationary phase: SI60 Eluent: *n*-hexane/EtOAc 85:15 isocratic, flow 0.8 mL/min

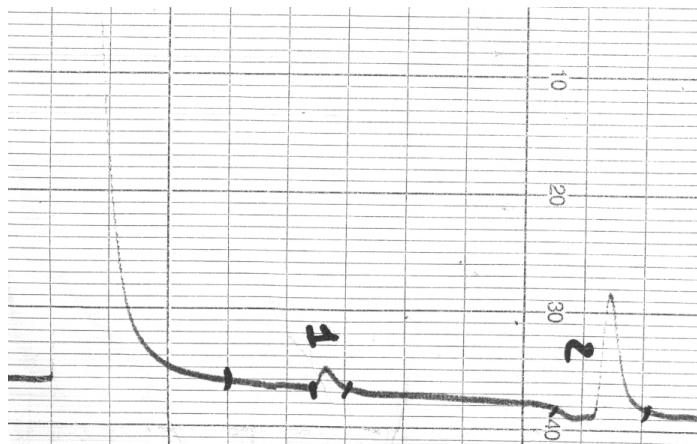

HPLC trace for purification of compounds **6a** (peak 3,  $t_R$  10 min) and **6b** (peak 2,  $t_R$  8.5 min)  
Stationary phase: SI60 Eluent: *n*-hexane/EtOAc 9:1 isocratic, flow 0.8 mL/min

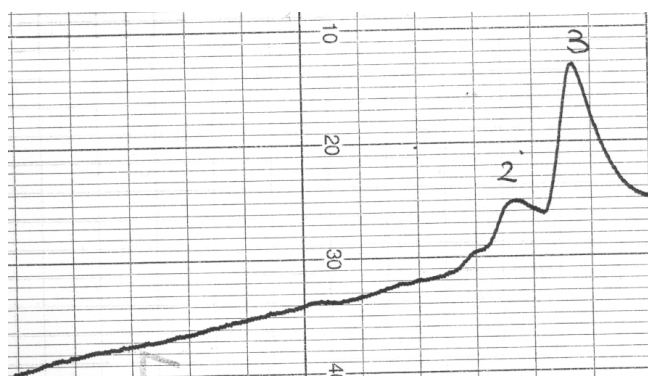

$^1\text{H}$  NMR spectrum (500 MHz) of compound **5a** in  $\text{CDCl}_3$

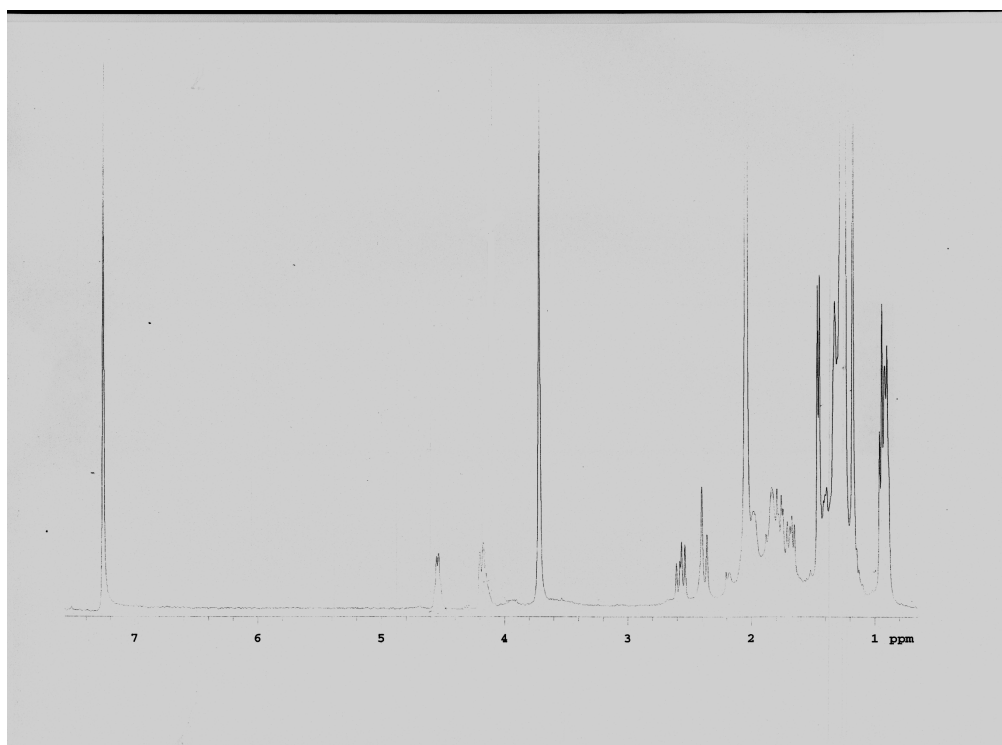

$^1\text{H}$  NMR spectrum (500 MHz) of compound **6a** in  $\text{CDCl}_3$

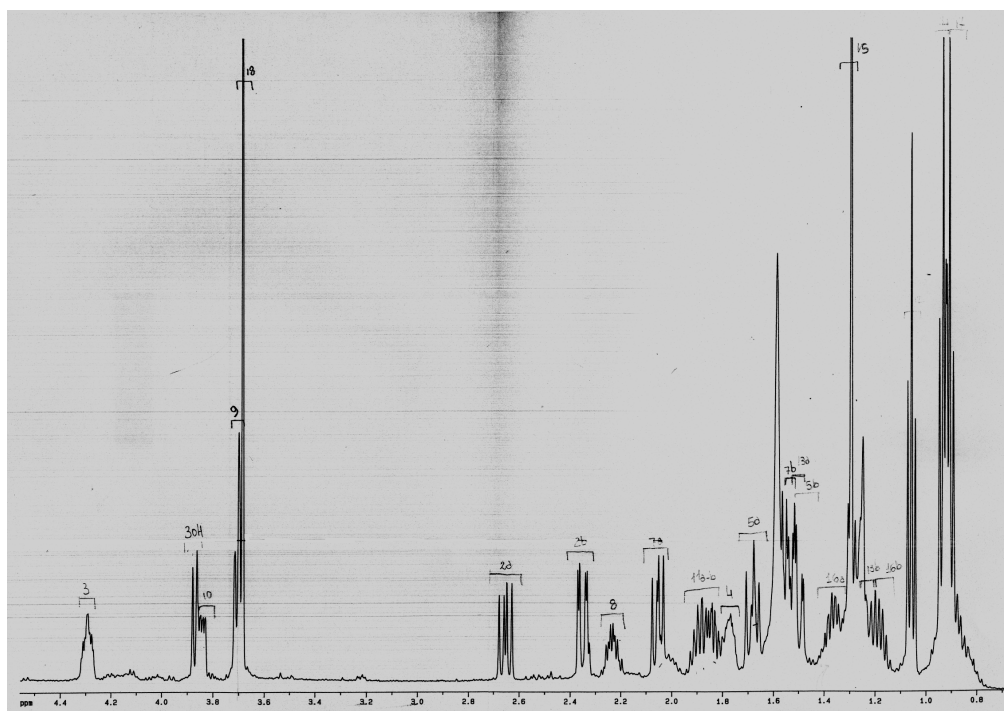

Supplement: b918600j.pdf [file b918600j.pdf]
